# Supplementary material for: Development of a Scoring Tool for Australian Rural Food Retail Environments
Source: MDPI journal article supplement (doi:10.3390/nu15214660), 2023-11-03
Supplement: s1 [file s1]

**Supplementary material 1.** Updated food outlets list with descriptions that was completed in Stage 2. Modifications to text were added by consensus by the expert group to describe outlets in their own area.

| Food Outlet Type                                            | Description                                                                                                                                                                                                                                                                                                                                                                                    |
|-------------------------------------------------------------|------------------------------------------------------------------------------------------------------------------------------------------------------------------------------------------------------------------------------------------------------------------------------------------------------------------------------------------------------------------------------------------------|
| <b>Supermarkets and Grocery Stores</b>                      |                                                                                                                                                                                                                                                                                                                                                                                                |
| Major supermarket                                           | Mainly engaged in the sale of groceries (fresh foods, canned and packaged foods, dry goods) of non-specialised (conventional) food lines. May contain a butcher or baker. Usually have 5 or more checkouts and a floor area over 1000 square metres. i.e., Woolworths, Coles, ALDI.                                                                                                            |
| Minor supermarket                                           | Mainly engaged in the sale of groceries (fresh foods, canned and packaged foods, dry goods) of non-specialised (conventional) food lines. <b>May contain a butcher or baker.</b> Usually have 4 or fewer checkouts and a floor area under 1000 square metres. e.g., independent grocer or supermarket.                                                                                         |
| Major or minor supermarket with alcohol                     | <b>Mainly engaged in the sale of groceries (fresh foods, canned and packaged foods, dry goods) of non-specialised (conventional) food lines. May contain a butcher or baker. Sells alcohol (contained within the premises). e.g., ALDI plus liquor; IGA plus liquor.</b>                                                                                                                       |
| Supermarket - unknown                                       | <b>Mainly engaged in the sale of groceries (fresh foods, canned and packaged foods, dry goods) of non-specialised (conventional) food lines. Unknown number of checkouts or floor area.</b>                                                                                                                                                                                                    |
| <b>Food and/or General Stores</b>                           |                                                                                                                                                                                                                                                                                                                                                                                                |
| Food and/or general store                                   | Mainly engaged in the sale of a limited line of groceries; generally includes milk, bread and canned and packaged foods. <b>Range is more limited than a minor supermarket and there may be wide variability in the proportion of core and non-core foods. Foods may vary seasonally.</b>                                                                                                      |
| Food and/or general store with alcohol and/or takeaway food | Mainly engaged in the sale of a limited line of groceries; generally includes milk, bread and canned and packaged foods. <b>Range is more limited than a minor supermarket and there may be wide variability in the proportion of core and non-core foods. Foods may vary seasonally. Also sells alcohol (contained within the premises) and/or takeaway foods e.g., burgers, fried foods.</b> |
| Food and/or general store - unknown                         | <b>Mainly engaged in the sale of a limited line of groceries; range of foods available is unknown.</b>                                                                                                                                                                                                                                                                                         |
| <b>Butchers and Poultry Shops</b>                           |                                                                                                                                                                                                                                                                                                                                                                                                |
| Butcher and/or poultry shop                                 | Mainly engaged in the sale of fresh <b>or frozen</b> meat <b>and/or poultry</b> ; <b>includes</b> wholesale stores with direct-to-public sales.                                                                                                                                                                                                                                                |
| Poultry shop with cooked and/or discretionary food          | Mainly engaged in the sale of fresh <b>or frozen</b> meat <b>and/or poultry</b> ; <b>includes</b> wholesale stores with direct-to-public sales. <b>Also sells cooked and/or discretionary food that may be available for takeaway e.g., nuggets, burgers, hot chips</b>                                                                                                                        |
| Hot chicken and chips shop                                  | <b>(i.e., cooked food items only) See 'Take away food'</b>                                                                                                                                                                                                                                                                                                                                     |
| Butcher and/or poultry shop - unknown                       | <b>Mainly engaged in the sale of meat and/or poultry; range of products available is unknown.</b>                                                                                                                                                                                                                                                                                              |
| <b>Fish and Seafood Shops</b>                               |                                                                                                                                                                                                                                                                                                                                                                                                |

| Food Outlet Type                                                  | Description                                                                                                                                                                                                                                                                                                   |
|-------------------------------------------------------------------|---------------------------------------------------------------------------------------------------------------------------------------------------------------------------------------------------------------------------------------------------------------------------------------------------------------|
| Fish and seafood shop (fishmonger)                                | Mainly engaged in the sale of fresh or frozen seafood for preparation off premises; includes wholesale stores with direct-to-public sales.                                                                                                                                                                    |
| Fish and seafood shop with cooked food                            | (Mainly?) engaged in the sale of fresh or frozen seafood for preparation off premises; also sells cooked food items for consumption on or off premises. Includes wholesale stores with direct-to-public sales and takeaway stores that provide a range of fresh seafood.                                      |
| Fish and chip shop                                                | (i.e., cooked food items only) See 'Take away food'                                                                                                                                                                                                                                                           |
| Fish and seafood shop - unknown                                   | Mainly engaged in the sale of seafood; range of products available is unknown.                                                                                                                                                                                                                                |
| <b>Bakers</b>                                                     |                                                                                                                                                                                                                                                                                                               |
| Bread shop                                                        | Mainly oriented towards bread, <del>biscuits, pastries or other flour</del> products, with or without packaging, including traditional and artisan breads. May contain minimal amounts of other non-bread discretionary items, such as pastries or baked goods.                                               |
| Bakery                                                            | Mainly oriented towards discretionary baked goods, such as <del>bread</del> , biscuits, pastries, pies, or other flour products, with or without packaging. Also sells limited bread (or other core) products.                                                                                                |
| Bread shop or bakery - unknown                                    | Mainly oriented towards bread and/or baked goods; range of core/discretionary products available is unknown.                                                                                                                                                                                                  |
| <b>Specialty Food Stores – Mixed Core and Discretionary Foods</b> |                                                                                                                                                                                                                                                                                                               |
| Gourmet food stores/ fine grocer?                                 | Mainly engaged in the sale of specialty packaged or fresh products; contains a mixture of core and discretionary foods (e.g., cured meats, sausage, cheese, pickled vegetables, oils, dips, artisan bread and crackers, olives). May showcase regional foods and provide dine-in options.                     |
| Delicatessens?                                                    | Mainly engaged in the sale of specialty packaged or fresh core and discretionary products such as cured meats and sausages; may also sell dips, cheeses, bread, and olives. May provide dine-in options.                                                                                                      |
| Gourmet food store - unknown                                      | Mainly engaged in the sale of specialty packaged or fresh products; range of core/discretionary products available is unknown.                                                                                                                                                                                |
| <b>Specialty Food Stores – Core Foods</b>                         |                                                                                                                                                                                                                                                                                                               |
| Wholefoods and grain stores                                       | Mainly engaged in the sale of <del>a limited line of</del> specialty wholefoods and grains <del>specialised food, such as</del> (e.g., dried lentils, seeds, nuts, dried fruits); items may be organic, packaged or unpackaged, and <del>a particular gourmet food that</del> can be defined under core food. |
| Cheese shop                                                       | Mainly engaged in the sale of specialty cheeses and other dairy products                                                                                                                                                                                                                                      |
| Specialty food store (core foods) - unknown                       | Mainly engaged in the sale of specialty core foods – range of products available is unknown.                                                                                                                                                                                                                  |
| <b>Specialty Food Stores – Discretionary Foods</b>                |                                                                                                                                                                                                                                                                                                               |
| Specialty food store – discretionary foods                        | Mainly engaged in the sale of specialty discretionary foods and beverages (e.g., <del>such as</del> ice-creams, donuts, waffles, cakes, confectionery, chocolate, etc.).                                                                                                                                      |
| Cake and pastry shop                                              | Mainly engaged in the sale of cakes, pastries, or other discretionary flour products. Does not sell bread. See 'bakery' for outlets that sell bread products.                                                                                                                                                 |

| Food Outlet Type                                     | Description                                                                                                                                                                                                                                                                                                                                                                                                                                                                                              |
|------------------------------------------------------|----------------------------------------------------------------------------------------------------------------------------------------------------------------------------------------------------------------------------------------------------------------------------------------------------------------------------------------------------------------------------------------------------------------------------------------------------------------------------------------------------------|
| Specialty food store (discretionary foods) - unknown | Mainly engaged in the sale of specialty discretionary foods – range of core/discretionary products available is unknown.                                                                                                                                                                                                                                                                                                                                                                                 |
| <b>Fruiterers &amp; Greengrocers</b>                 |                                                                                                                                                                                                                                                                                                                                                                                                                                                                                                          |
| Fruit and vegetable shop                             | Mainly engaged in the sale of fresh fruit and vegetables; including wholesale stores with direct to public sales. May contain a limited range of other core and discretionary foods, such as juices, pasta, sauces, nuts, crackers, and confectionery.                                                                                                                                                                                                                                                   |
| Fruit and vegetable shop - unknown                   | Mainly engaged in the sale of fresh fruit and vegetables; range of other core and discretionary foods is unknown (e.g., juices, pasta, sauces, nuts, crackers and confectionery).                                                                                                                                                                                                                                                                                                                        |
| <b>Cafes &amp; Restaurants</b>                       |                                                                                                                                                                                                                                                                                                                                                                                                                                                                                                          |
| Café/restaurant – discretionary foods                | Mainly engaged in the preparation and sale of discretionary meals/snacks for consumption on the premises; table service provided; may sell alcohol with food; may provide takeaway services (but is not a fast-food outlet). Provide examples? For example, coffee shop with a wide range of cakes and slices available, or restaurant with mainly high fat/salt/sugar (such as battered or fried) options available.                                                                                    |
| Café/restaurant –core foods                          | Mainly engaged in the preparation and sale of core food meals/snacks for consumption on the premises; table service provided; may sell alcohol with food; may provide takeaway services (but is not a fast-food outlet). Provide examples? For example, café or restaurant with mainly salad/soup/sandwich options                                                                                                                                                                                       |
| Café/restaurant – mixed or unknown                   | Mainly engaged in the preparation and sale of a mixture of discretionary and core food meals/snacks (OR range of food options is unknown) for consumption on the premises; table service provided; may sell alcohol with food; may provide takeaway services (but is not a fast-food outlet). Provide examples?                                                                                                                                                                                          |
| <b>Take Away/Fast Food</b>                           |                                                                                                                                                                                                                                                                                                                                                                                                                                                                                                          |
| Take away – discretionary foods                      | Mainly engaged in the preparation and sale of discretionary meals/snacks (e.g., kebab, fish & chips, chicken & chips, burgers, pizzas). Food is ready for immediate consumption; table service not typically provided; meals can be eaten on site, taken away or delivered; <del>shop is not a franchise</del> . Excludes donuts, drinks, and ice-cream (see 'Specialty food store – discretionary'). <del>The food shop is a franchise/chain store with food being sold in specialised packaging.</del> |
| Take away –core foods                                | Mainly engaged in the preparation and sale of core food meals/snacks (e.g., choice of salads, wraps, sandwiches). Food is ready for immediate consumption; table service not typically provided; meals can be eaten on site, taken away or delivered; <del>shop is not a franchise</del> . Include Mexican? Sushi?                                                                                                                                                                                       |
| Take away - mixed or unknown                         | Mainly engaged in the preparation and sale of a mixture of discretionary and core food meals/snacks (e.g., burgers, fries, pizzas, fried foods, sandwiches, choice of salads, sushi; OR range of food options is unknown). Food is ready for immediate consumption; table service not typically                                                                                                                                                                                                          |

| Food Outlet Type                                                                                                                                                                                                | Description                                                                                                                                                                                                                          |
|-----------------------------------------------------------------------------------------------------------------------------------------------------------------------------------------------------------------|--------------------------------------------------------------------------------------------------------------------------------------------------------------------------------------------------------------------------------------|
|                                                                                                                                                                                                                 | provided; meals can be eaten on site, taken away or delivered. Excludes donuts, drinks, and ice-cream (see ' <i>Specialty food store – discretionary</i> ').                                                                         |
| <b>Pubs, Clubs &amp; Hotels</b>                                                                                                                                                                                 |                                                                                                                                                                                                                                      |
| Pub, club, hotel – large range                                                                                                                                                                                  | Venue that predominantly serves alcohol, with a large range of food options available, including individually designated restaurants/venues within the establishment.                                                                |
| Pub, club, hotel – limited range                                                                                                                                                                                | Venue that predominantly serves alcohol, with a limited range of food options available. For example, those offering counter meal-type menus.                                                                                        |
| Pub, club, hotel – packaged foods                                                                                                                                                                               | Venue that predominantly serves alcohol, but has only pre-packaged, shelf-stable or vending machine-type foods available as food options.                                                                                            |
| Pub, club, hotel - unknown                                                                                                                                                                                      | Venue that predominantly serves alcohol; range of food options available is unknown.                                                                                                                                                 |
| <b>Bottle Shops &amp; Liquor Stores</b>                                                                                                                                                                         |                                                                                                                                                                                                                                      |
| Bottle shop or liquor store                                                                                                                                                                                     | Mainly engaged in the sale of alcoholic beverages to the public for consumption off premises. Sale of alcohol is separate if co-located (e.g., separate to supermarket or general store); may offer home delivery and/or mail order. |
| <p>NB Red text indicates modification, addition or deletion to existing description by expert group</p> <p>NB Blue text indicates addition of a new category or sub-category of food outlet by expert group</p> |                                                                                                                                                                                                                                      |
