# Supplementary material for: Development of a Scoring Tool for Australian Rural Food Retail Environments
Source: MDPI journal article supplement (doi:10.3390/nu15214660), 2023-11-03
Supplement: s1 [file s1]

**Supplementary materials S2: Draft food outlet scoring tool (results from Stage 4)**

| Food Outlet                                                 | Description                                                                                                                                                                                                                                                                                                                                                                             | Score after 2 rounds |       |
|-------------------------------------------------------------|-----------------------------------------------------------------------------------------------------------------------------------------------------------------------------------------------------------------------------------------------------------------------------------------------------------------------------------------------------------------------------------------|----------------------|-------|
|                                                             |                                                                                                                                                                                                                                                                                                                                                                                         | mean                 | (sd)  |
| Supermarkets and Grocery Stores                             |                                                                                                                                                                                                                                                                                                                                                                                         |                      |       |
| Major supermarket                                           | Mainly engaged in the sale of groceries (fresh foods, canned and packaged foods, dry goods) of non-specialised (conventional) food lines. May contain a butcher or baker. Usually have 5 or more checkouts and a floor area over 1000 square metres. i.e., Woolworths, Coles, ALDI.                                                                                                     | 5.0                  | (0.0) |
| Minor supermarket                                           | Mainly engaged in the sale of groceries (fresh foods, canned and packaged foods, dry goods) of non-specialised (conventional) food lines. May contain a butcher or baker. Usually have 4 or fewer checkouts and a floor area under 1000 square metres. e.g., independent grocer or supermarket.                                                                                         | 4.3                  | (0.5) |
| Major or minor supermarket with alcohol                     | Mainly engaged in the sale of groceries (fresh foods, canned and packaged foods, dry goods) of non-specialised (conventional) food lines. May contain a butcher or baker. Sells alcohol (contained within the premises). e.g., ALDI plus liquor; IGA plus liquor.                                                                                                                       | 1.6                  | (1.4) |
| Supermarket - unknown                                       | Mainly engaged in the sale of groceries (fresh foods, canned and packaged foods, dry goods) of non-specialised (conventional) food lines. Unknown number of checkouts or floor area.                                                                                                                                                                                                    | 4.2                  | (0.7) |
| Food and/or General Stores                                  |                                                                                                                                                                                                                                                                                                                                                                                         |                      |       |
| Food and/or general store                                   | Mainly engaged in the sale of a limited line of groceries; generally includes milk, bread and canned and packaged foods. Range is more limited than a minor supermarket and there may be wide variability in the proportion of core and non-core foods. Foods may vary seasonally.                                                                                                      | 3.6                  | (0.9) |
| Food and/or general store with alcohol and/or takeaway food | Mainly engaged in the sale of a limited line of groceries; generally includes milk, bread and canned and packaged foods. Range is more limited than a minor supermarket and there may be wide variability in the proportion of core and non-core foods. Foods may vary seasonally. Also sells alcohol (contained within the premises) and/or takeaway foods e.g., burgers, fried foods. | -2.1                 | (2.3) |
| Food and/or general store - unknown                         | Mainly engaged in the sale of a limited line of groceries; range of foods available is unknown.                                                                                                                                                                                                                                                                                         | 0.7                  | (1.2) |
| Service station convenience store                           | Primarily sells petrol/diesel and pre-prepared foods-to-go, snacks and take away foods. It may also sell frozen goods, dairy foods, bakery items, beverages and a range of non-food items.                                                                                                                                                                                              | -4.1                 | (2.9) |
| Roadhouse                                                   | Restaurant/cafe based at a service station/petrol station that provides cooked meals for travellers with a sit-down option that includes main meals and/or take away food options; meal options typically over 12-24 hours.                                                                                                                                                             | -4.0                 | (1.8) |
| Canteens                                                    | An outlet that is mainly engaged in the preparation and sale of mainly non-core meals/snacks for consumption of people within an institution like a school, camp, sporting facilities or workplace and is often volunteer run.                                                                                                                                                          | -4.8                 | (1.6) |

**Supplementary materials S2: Draft food outlet scoring tool (results from Stage 4)**

| Food Outlet                                                | Description                                                                                                                                                                                                                                                                               | Score after 2 rounds |       |
|------------------------------------------------------------|-------------------------------------------------------------------------------------------------------------------------------------------------------------------------------------------------------------------------------------------------------------------------------------------|----------------------|-------|
|                                                            |                                                                                                                                                                                                                                                                                           | mean                 | (sd)  |
| Butchers and Poultry Shops                                 |                                                                                                                                                                                                                                                                                           |                      |       |
| Butcher and/or poultry shop                                | Mainly engaged in the sale of fresh or frozen meat and/or poultry; includes wholesale stores with direct-to-public sales.                                                                                                                                                                 | 8.0                  | (1.1) |
| Poultry shop with cooked and/or discretionary food         | Mainly engaged in the sale of fresh or frozen meat and/or poultry; includes wholesale stores with direct-to-public sales. Also sells cooked and/or discretionary food that may be available for takeaway e.g., nuggets, burgers, hot chips                                                | 0.2                  | (0.4) |
| Butcher and/or poultry shop - unknown                      | Mainly engaged in the sale of meat and/or poultry; range of products available is unknown.                                                                                                                                                                                                | 5.0                  | (0.0) |
| Fish and Seafood Shops                                     |                                                                                                                                                                                                                                                                                           |                      |       |
| Fish and seafood shop (fishmonger)                         | Mainly engaged in the sale of fresh or frozen seafood for preparation off premises; includes wholesale stores with direct-to-public sales.                                                                                                                                                | 9.8                  | (0.4) |
| Fish and seafood shop with cooked food                     | Mainly engaged in the sale of fresh or frozen seafood for preparation off premises; also sells cooked food items for consumption on or off premises. Includes wholesale stores with direct-to-public sales and takeaway stores that provide a range of fresh seafood.                     | 2.7                  | (2.3) |
| Fish and seafood shop - unknown                            | Mainly engaged in the sale of seafood; range of products available is unknown.                                                                                                                                                                                                            | 3.0                  | (2.4) |
| Bakers                                                     |                                                                                                                                                                                                                                                                                           |                      |       |
| Bread shop                                                 | Mainly oriented towards bread products, with or without packaging, including traditional and artisan breads. May contain minimal amounts of other non-bread discretionary items, such as pastries or baked goods.                                                                         | 8.2                  | (1.0) |
| Bakery                                                     | Mainly oriented towards discretionary baked goods, such as biscuits, pastries, pies, or other flour products, with or without packaging. Also sells limited bread (or other core) products.                                                                                               | -5.0                 | (0.0) |
| Bread shop or bakery - unknown                             | Mainly oriented towards bread and/or baked goods; range of core/discretionary products available is unknown.                                                                                                                                                                              | -1.7                 | (2.1) |
| Specialty Food Stores – Mixed Core and Discretionary Foods |                                                                                                                                                                                                                                                                                           |                      |       |
| Gourmet food stores and delicatessens                      | Mainly engaged in the sale of specialty packaged or fresh products; contains a mixture of core and discretionary foods (e.g., cured meats, sausage, cheese, pickled vegetables, oils, dips, artisan bread and crackers, olives). May showcase regional foods and provide dine-in options. | 0.1                  | (1.4) |
| Gourmet food stores and delicatessens with alcohol         | May be part of a vineyard cellar door with dine-in or takeaway food product options                                                                                                                                                                                                       | -2.6                 | (2.6) |
| Gourmet food store - unknown                               | Mainly engaged in the sale of specialty packaged or fresh products; range of core/discretionary products available is unknown.                                                                                                                                                            | -0.5                 | (1.8) |

**Supplementary materials S2: Draft food outlet scoring tool (results from Stage 4)**

| Food Outlet                                                                  | Description                                                                                                                                                                                                                                                                                                                                                                                                                  | Score after 2 rounds |       |
|------------------------------------------------------------------------------|------------------------------------------------------------------------------------------------------------------------------------------------------------------------------------------------------------------------------------------------------------------------------------------------------------------------------------------------------------------------------------------------------------------------------|----------------------|-------|
|                                                                              |                                                                                                                                                                                                                                                                                                                                                                                                                              | mean                 | (sd)  |
| Specialty Core Food Stores                                                   |                                                                                                                                                                                                                                                                                                                                                                                                                              |                      |       |
| Wholefoods and grain stores                                                  | Mainly engaged in the sale of specialty wholefoods and grains (e.g., dried lentils, seeds, nuts, dried fruits); items may be organic, packaged or unpackaged, and can be defined under core food.                                                                                                                                                                                                                            | 8.6                  | (1.2) |
| Cheese shop                                                                  | Mainly engaged in the sale of specialty cheeses and other dairy products                                                                                                                                                                                                                                                                                                                                                     | 3.3                  | (1.9) |
| Specialty core food store - unknown                                          | Mainly engaged in the sale of specialty core foods – range of products available is unknown.                                                                                                                                                                                                                                                                                                                                 | 4.8                  | (0.4) |
| Specialty Discretionary Food Stores                                          |                                                                                                                                                                                                                                                                                                                                                                                                                              |                      |       |
| Specialty discretionary food store                                           | Mainly engaged in the sale of specialty discretionary foods and beverages (e.g., ice-creams, donuts, waffles, cakes, confectionery, chocolate, etc.).                                                                                                                                                                                                                                                                        | -9.4                 | (0.5) |
| Cake and pastry shop                                                         | Mainly engaged in the sale of cakes, pastries, or other discretionary flour products. Does not sell bread. <i>See 'bakery' for outlets that sell bread products.</i>                                                                                                                                                                                                                                                         | -8.9                 | (0.8) |
| Specialty discretionary food store - unknown                                 | Mainly engaged in the sale of specialty discretionary foods – range of core/discretionary products available is unknown.                                                                                                                                                                                                                                                                                                     | -6.8                 | (1.6) |
| Fruiterers & Greengrocers                                                    |                                                                                                                                                                                                                                                                                                                                                                                                                              |                      |       |
| Fruit and vegetable shop                                                     | Mainly engaged in the sale of fresh fruit and vegetables, including wholesale stores with direct to public sales. May contain a limited range of other core and discretionary foods, such as juices, pasta, sauces, nuts, crackers, and confectionery.                                                                                                                                                                       | 9.7                  | (0.5) |
| Fruit and vegetable shop - unknown                                           | Mainly engaged in the sale of fresh fruit and vegetables; range of other core and discretionary foods is unknown (e.g., juices, pasta, sauces, nuts, crackers and confectionery).                                                                                                                                                                                                                                            | 8.4                  | (0.5) |
| Local produce stall, community gardens and non-commercial farmgate suppliers | Mainly engaged in the sale of limited numbers of locally grown core foods such as fruit, vegetables, eggs, honey or home-made products to members of a particular community, often at a reduced price.                                                                                                                                                                                                                       | 9.4                  | (0.5) |
| Farmers market and commercial farmgate suppliers                             | Mainly engaged in the sale of core foods eggs, meat, dairy, honey, fruit and vegetables grown locally. May also be engaged in the sale of non-core foods such as jams and spreads                                                                                                                                                                                                                                            | 9.1                  | (0.2) |
| Cafes & Restaurants                                                          |                                                                                                                                                                                                                                                                                                                                                                                                                              |                      |       |
| Café/restaurant – discretionary foods                                        | Mainly engaged in the preparation and sale of discretionary meals/snacks for consumption on the premises; table service provided; may sell alcohol with food; may provide takeaway services (but is not a fast-food outlet). <i>Provide examples? For example, coffee shop with a wide range of cakes and slices available, or restaurant with mainly high fat/salt/sugar (such as battered or fried) options available.</i> | -4.5                 | (4.3) |

**Supplementary materials S2: Draft food outlet scoring tool (results from Stage 4)**

| Food Outlet                                                                                                                                                                                                                   | Description                                                                                                                                                                                                                                                                                                                                                                                                                                                                                           | Score after 2 rounds |       |
|-------------------------------------------------------------------------------------------------------------------------------------------------------------------------------------------------------------------------------|-------------------------------------------------------------------------------------------------------------------------------------------------------------------------------------------------------------------------------------------------------------------------------------------------------------------------------------------------------------------------------------------------------------------------------------------------------------------------------------------------------|----------------------|-------|
|                                                                                                                                                                                                                               |                                                                                                                                                                                                                                                                                                                                                                                                                                                                                                       | mean                 | (sd)  |
| Café/restaurant – core foods                                                                                                                                                                                                  | Mainly engaged in the preparation and sale of core food meals/snacks for consumption on the premises; table service provided; may sell alcohol with food; may provide takeaway services (but is not a fast food outlet). <i>Provide examples? For example, café or restaurant with mainly salad/soup/sandwich options</i>                                                                                                                                                                             | 5.2                  | (0.4) |
| Café/restaurant – mixed or unknown                                                                                                                                                                                            | Mainly engaged in the preparation and sale of a mixture of discretionary and core food meals/snacks (OR range of food options is unknown) for consumption on the premises; table service provided; may sell alcohol with food; may provide takeaway services (but is not a fast-food outlet).                                                                                                                                                                                                         | 0.0                  | (0.0) |
| <b>Take Away/Fast Food</b>                                                                                                                                                                                                    |                                                                                                                                                                                                                                                                                                                                                                                                                                                                                                       |                      |       |
| Take away – discretionary foods                                                                                                                                                                                               | Mainly engaged in the preparation and sale of discretionary meals/snacks (e.g., kebab, fish & chips, chicken & chips, burgers, pizzas). Food is ready for immediate consumption; table service not typically provided; meals may be eaten on site, taken away or delivered. <b>May include pop-ups, food trucks and vans.</b> Excludes donuts, drinks, and ice-cream (see 'Specialty food store – discretionary').                                                                                    | -9.3                 | (0.8) |
| Take away – core foods                                                                                                                                                                                                        | Mainly engaged in the preparation and sale of core food meals/snacks (e.g., choice of salads, wraps, sandwiches). Food is ready for immediate consumption; table service not typically provided; meals may be eaten on site, taken away or delivered. <b>May include pop-ups, food trucks and vans.</b>                                                                                                                                                                                               | 5.0                  | (0.0) |
| Take away - mixed or unknown                                                                                                                                                                                                  | Mainly engaged in the preparation and sale of a mixture of discretionary and core food meals/snacks (e.g., burgers, fries, pizzas, fried foods, sandwiches, choice of salads, sushi; OR range of food options is unknown). Food is ready for immediate consumption; table service not typically provided; meals may be eaten on site, taken away or delivered. <b>May include pop-ups, food trucks and vans.</b> Excludes donuts, drinks, and ice-cream (see 'Specialty food store – discretionary'). | -2.8                 | (1.6) |
| <b>Pubs, Clubs &amp; Hotels</b>                                                                                                                                                                                               |                                                                                                                                                                                                                                                                                                                                                                                                                                                                                                       |                      |       |
| Pub, club, hotel – large range                                                                                                                                                                                                | Venue that predominantly serves alcohol, with a large range of food options available, including individually designated restaurants/venues within the establishment.                                                                                                                                                                                                                                                                                                                                 | -5.0                 | (0.6) |
| Pub, club, hotel – limited range                                                                                                                                                                                              | Venue that predominantly serves alcohol, with a limited range of food options available. For example, those offering counter meal-type menus.                                                                                                                                                                                                                                                                                                                                                         | -7.0                 | (1.1) |
| Pub, club, hotel – packaged foods                                                                                                                                                                                             | Venue that predominantly serves alcohol, but has only pre-packaged, shelf-stable or vending machine-type foods available as food options.                                                                                                                                                                                                                                                                                                                                                             | -9.6                 | (0.5) |
| Pub, club, hotel - unknown                                                                                                                                                                                                    | Venue that predominantly serves alcohol; range of food options available is unknown.                                                                                                                                                                                                                                                                                                                                                                                                                  | -7.7                 | (1.6) |
| Bottle shop or liquor store                                                                                                                                                                                                   | Mainly engaged in the sale of alcoholic beverages to the public for consumption off premises. Sale of alcohol is separate if co-located (e.g., separate to supermarket or general store); may offer home delivery and/or mail order.                                                                                                                                                                                                                                                                  | -10.0                | (0.0) |
| <p><i>NB Red text indicates modification, addition or deletion to existing description by expert group</i></p> <p><i>NB Blue text indicates addition of a new category or sub-category of food outlet by expert group</i></p> |                                                                                                                                                                                                                                                                                                                                                                                                                                                                                                       |                      |       |
